# Supplementary material for: Quantitative detection of procalcitonin using an electrochemical immunosensor based on MoO3/Au@rGO nanocomposites
Source: Royal Society of Chemistry journal article supplement (doi:10.1039/c9an01721f), 2019-01-01
Supplement: c9an01721f1.pdf [file c9an01721f1.pdf]

# Supplementary Material

## **Quantitative Detection of Procalcitonin by Electrochemical Immunosensor Based on MoO<sub>3</sub>/Au@rGO Nanocomposites**

Jianqiao Liu, Li Quan, Xuelian Yu \*, Lin Wang \*

Beijing Key Laboratory of Materials Utilization of Nonmetallic Minerals and Solid Wastes,  
National Laboratory of Mineral Materials, School of Materials Science and Technology,  
China University of Geosciences, 100083, Beijing, China.

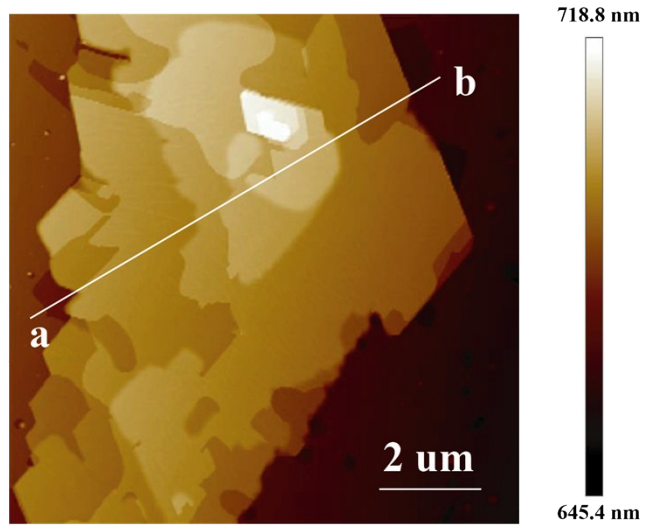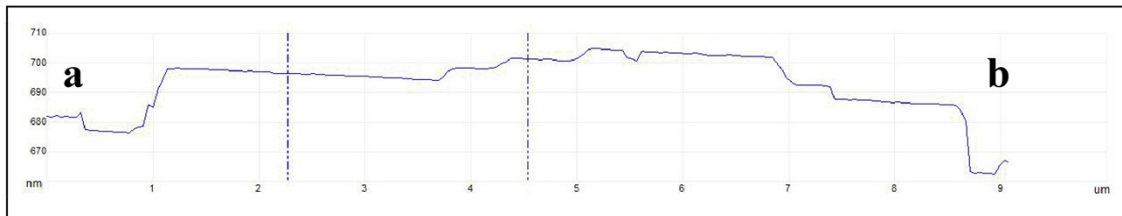

**Figure S1.** AFM image of rGO.

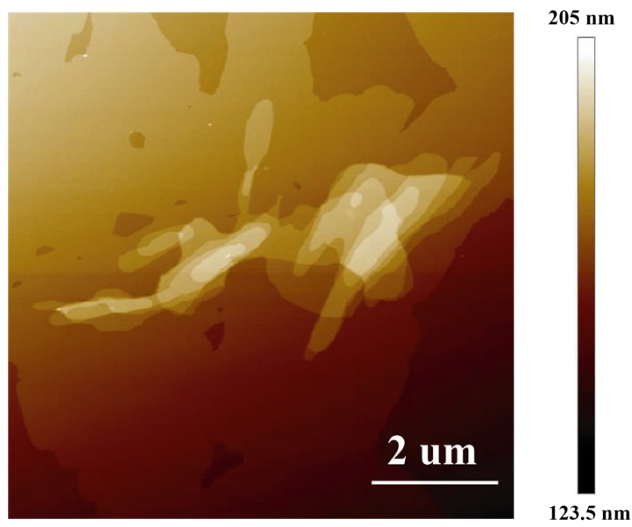

**Figure S2.** AFM image of  $\text{MoO}_3$ @rGO.

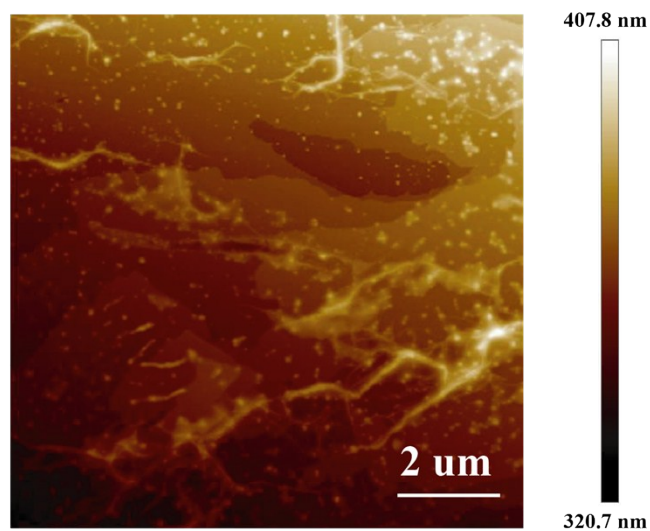

**Figure S3.** AFM image of MoO<sub>3</sub>/Au@rGO.

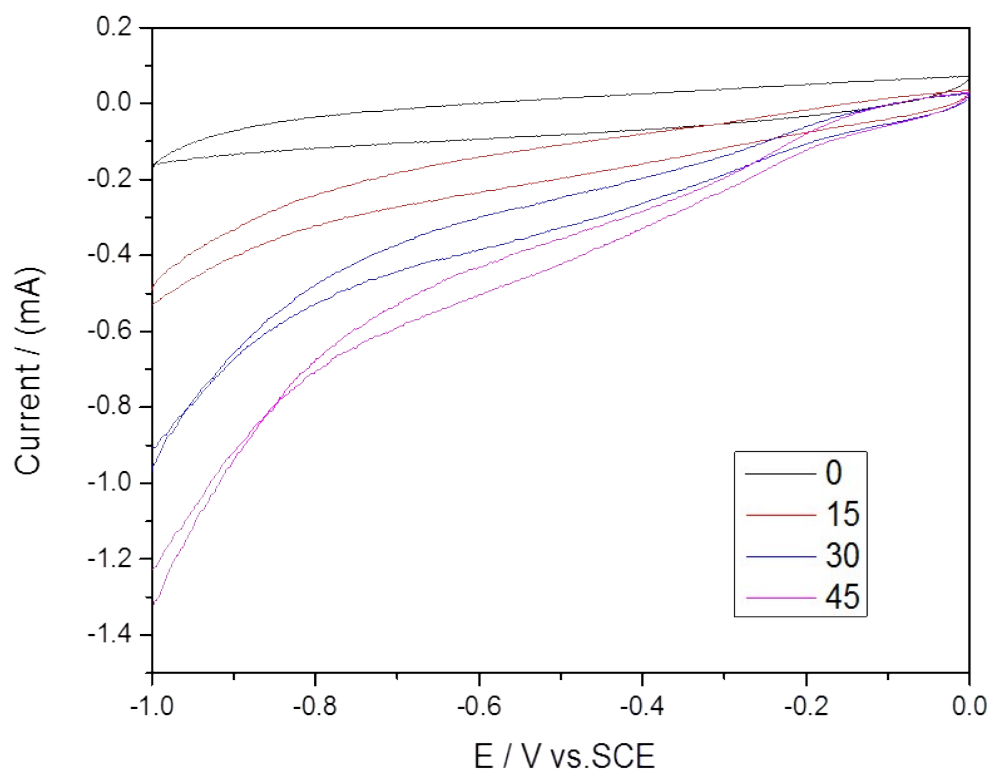

**Figure S4.** CV curves of MoO<sub>3</sub>/Au@rGO nanocomposites in PBS buffer solution containing different volumes (μL) of H<sub>2</sub>O<sub>2</sub>.

**Table S1.** Impedance parameters derived using the equivalent circuit model for the electrodes.

| Electrodes                                                                    | $R_s(\Omega)$ | $C_{dl}(F)$ | $R_{et}(\Omega)$ |
|-------------------------------------------------------------------------------|---------------|-------------|------------------|
| GCE                                                                           | 81.70         | 0.73086     | 201.1            |
| Au/GCE                                                                        | 75.77         | 0.75341     | 203.0            |
| Ab <sub>1</sub> -Au/GCE                                                       | 72.96         | 0.70545     | 209.1            |
| BSA/Ab <sub>1</sub> -Au/GCE                                                   | 86.89         | 0.89700     | 624.6            |
| PCT/BSA/Ab <sub>1</sub> -Au/GCE                                               | 71.92         | 0.88510     | 960.6            |
| Ab <sub>2</sub> -PCT/BSA/Ab <sub>1</sub> -Au/GCE                              | 68.45         | 0.88376     | 2323             |
| MoO <sub>3</sub> /Au@rGO/Ab <sub>2</sub> -PCT/BSA/Ab <sub>1</sub> -<br>Au/GCE | 71.48         | 0.90074     | 3791             |

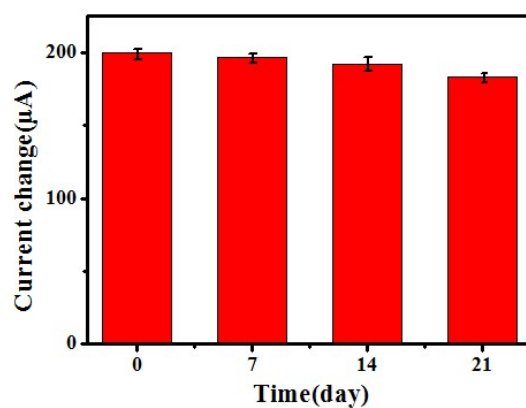

**Figure S5.** Current response of the immunosensor after different days.
